# Supplementary material for: Microwave-assisted synthesis of 6,6′-(aryl(alkyl)methylene)bis(2,4-dialkylphenol) antioxidants catalyzed by multi-sulfonated reduced graphene oxide nanosheets in water
Source: Royal Society of Chemistry journal article supplement (doi:10.1039/c4nj02340d), 2015-01-01

**Supporting Information**

**Microwave-assisted synthesis of 6,6'-(aryl(alkyl)methylene)bis(2,4-dialkylphenol) antioxidants catalyzed by multi sulfonated reduced graphene oxide nanosheets in water**

Hossein Naeimi\*, Mohsen Golestanzadeh

Department of Organic Chemistry, Faculty of Chemistry, University of Kashan, Kashan,  
8731751167, I. R. Iran

E-mail: [naeimi@kashanu.ac.ir](mailto:naeimi@kashanu.ac.ir)

# <sup>1</sup>H NMR Spectra of prepared compounds.

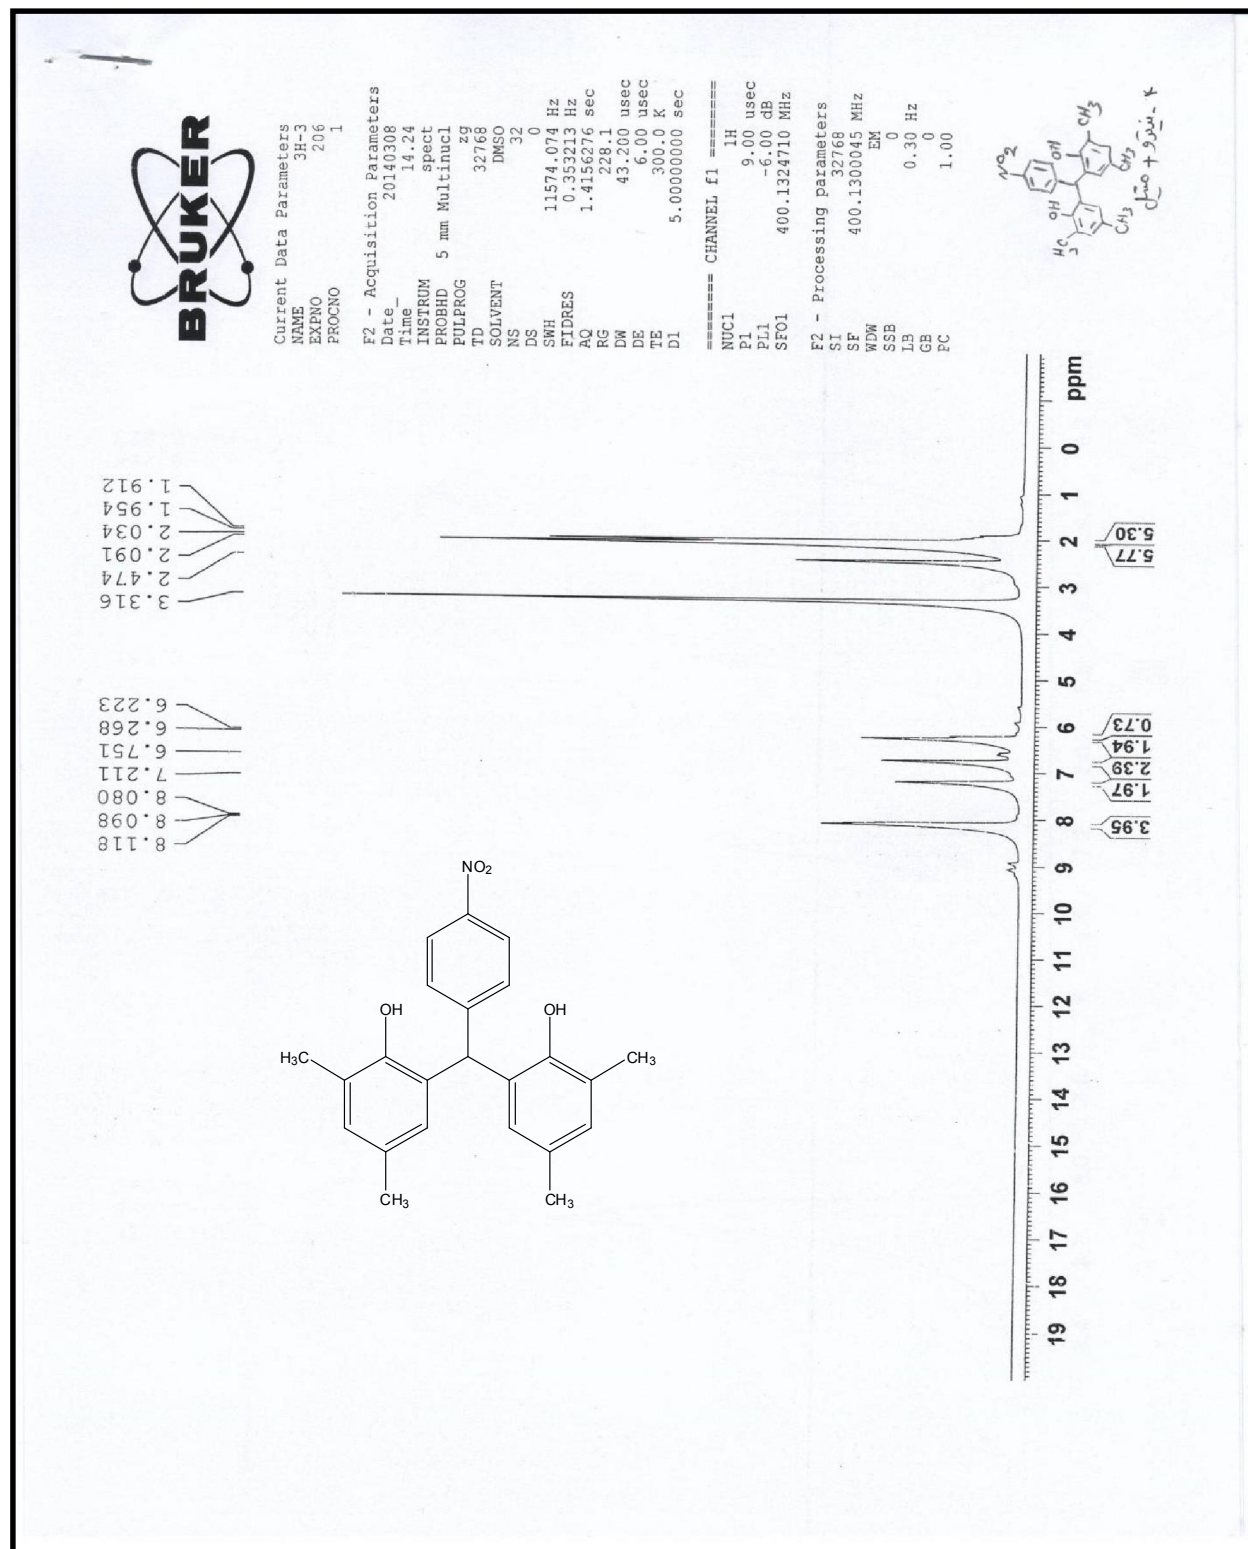

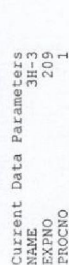

## F2 - Acquisition Parameters

|         |                |
|---------|----------------|
| Date    | 20140308       |
| Time    | 15.02          |
| INSTRUM | spect          |
| PROBHD  | 5 mm Multinuc1 |
| PULPROG | zg             |
| TD      | 32768          |
| DELTD   | 16             |
| SOLVENT | DMSO           |
| NS      | 16             |
| DSH     | 11574.074 Hz   |
| WDW     | 0.35713 Hz     |
| FIDRES  | 0.35713 Hz     |
| RG      | 1.4158276 sec  |
| SG      | 101.6 sec      |
| DE      | 43.200 usec    |
| TE      | 6.00 usec      |
| DE      | 300.0 K        |
| OT      | 5.00000000 sec |
| 01      |                |

```
===== CHANNEL f1 =====
NUC1      1H
P1        9.00 usec
PL1       -6.00 dB
SF01      400.1324710 MHz
```

| F2 - Processing parameters |                 |
|----------------------------|-----------------|
| SI                         | 32768           |
| SF                         | 400.1300045 MHz |
| WDW                        | EM              |
| SSB                        | 0               |
| LB                         | 0.30 Hz         |
| GB                         | 0               |
| PC                         | 1.00            |

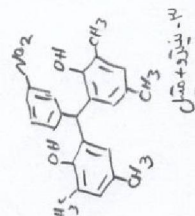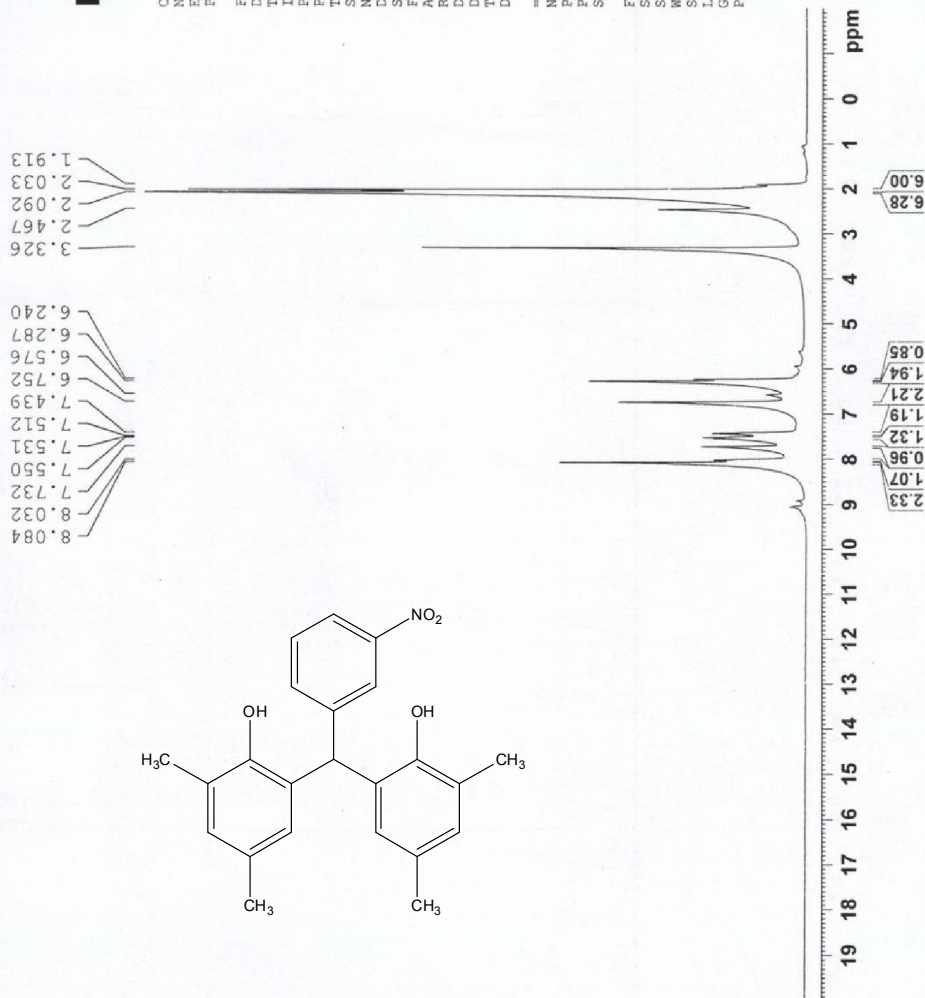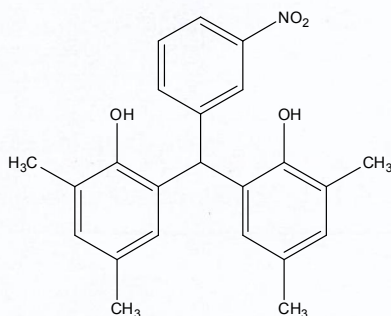

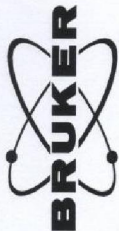

Current Data Parameters  
NAME 3H-3  
EXPNO 234  
PROCNO 1

F2 - Acquisition Parameters  
Date\_ 20140312  
Time 8.16  
INSTRUM spect  
PROBHD 5 mm Multinucl  
PULPROG zg  
TD 32768  
SOLVENT DMSO  
NS 32  
DS 0  
SWH 11574.074 Hz  
FIDRES 0.353213 Hz  
AQ 1.4156276 sec  
RG 161.3  
DW 43.200 usec  
DE 6.00 usec  
TE 300.0 K  
D1 5.00000000 sec

===== CHANNEL f1 =====  
NUC1 1H  
P1 9.00 usec  
PL1 -6.00 dB  
SFO1 400.1324710 MHz

F2 - Processing parameters  
SI 32768  
SF 400.1300045 MHz  
WDW EM  
SSB 0  
LB 0.30 Hz  
GB 0  
PC 1.00

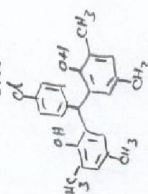

$\delta_{TMS} + 9.55 - 14$

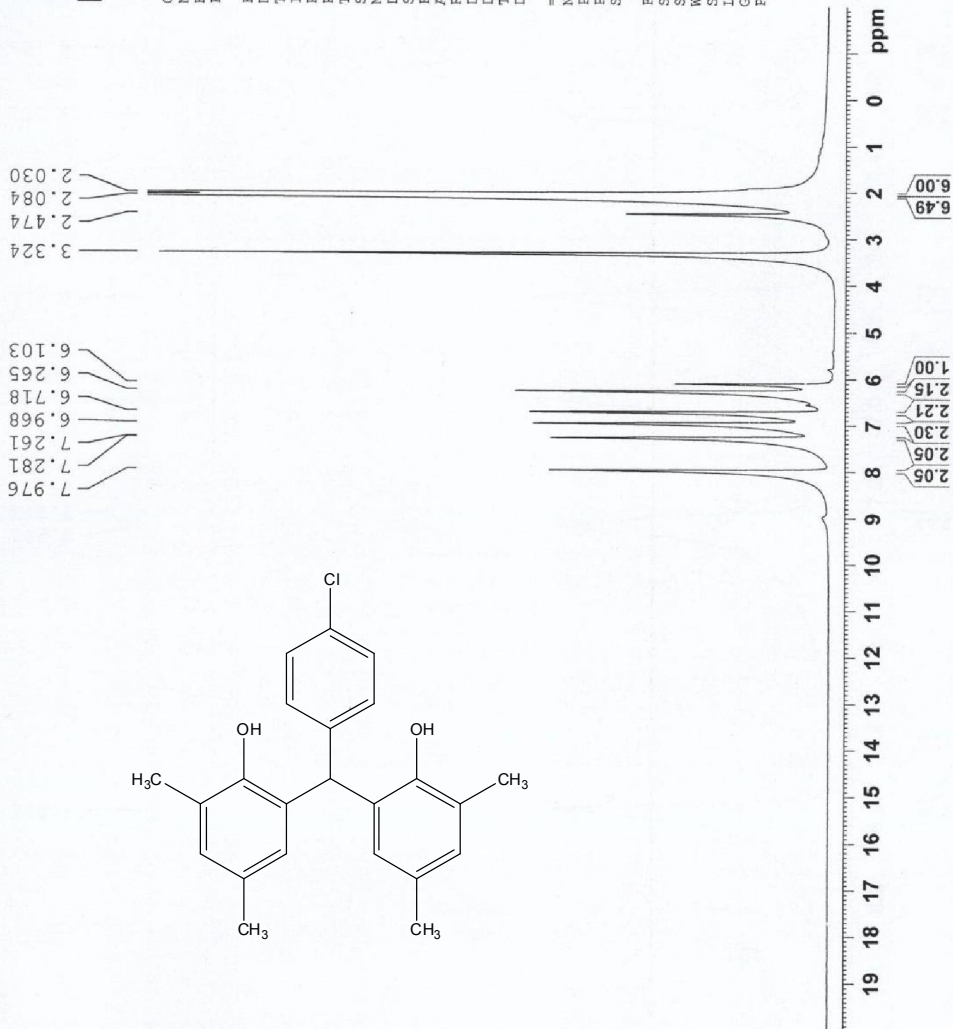

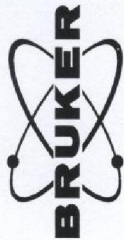

Current Data Parameters  
NAME 3H-3  
EXPNO 171  
PROCNO 1

F2 - Acquisition Parameters

Date\_ 20140304  
Time\_ 8.37  
INSTRUM spect  
PROBHD 5 mm Multinucl  
PULPROG zg  
TD 32768  
SOLVENT DMSO  
NS 32  
DS 0  
SWH 11574.074 Hz  
FIDRES 0.353213 Hz  
AQ 1.4156276 sec  
RG 64  
DM 43.200 usec  
DE 6.00 usec  
TE 300.0 K  
D1 5.00000000 sec

===== CHANNEL f1 =====  
NUC1 1H  
P1 9.00 usec  
PL1 -6.00 dB  
SFO1 400.1324710 MHz

F2 - Processing parameters

SI 32768  
SF 400.1300045 MHz  
WDW EM  
SSB 0  
LB 0.30 Hz  
GB 0  
PC 1.00

7.964  
7.359  
7.181  
6.835  
6.719  
6.403  
6.195  
3.337  
2.473  
2.086  
2.018  
1.968  
1.936  
1.913

1.90  
1.28  
2.29  
1.15  
1.94  
1.15  
2.23  
6.18  
5.02

ppm

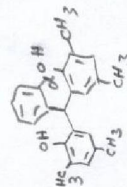

3-متیل-4-هیدروکسی-تولین



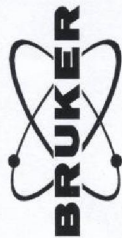

Current Data Parameters  
NAME 3H-3  
EXPNO 241  
PROCNO 1

F2 - Acquisition Parameters

Date\_ 20140315  
Time\_ 8:57  
INSTRUM spect  
PROBHD 5 mm Multinucl  
PULPROG zg  
TD 32768  
SOLVENT DMSO  
NS 32  
DS  
SWH 11574.074 Hz  
FIDRES 0.353213 Hz  
AQ 1.4156276 sec  
RG 161.3  
DW 43.200 usec  
DE 6.00 usec  
TE 300.0 K  
D1 5.00000000 sec

CHANNEL f1  
NUC1 <sup>1</sup>H  
P1 9.00 usec  
PL1 -6.00 dB  
SFO1 400.1324710 MHz

F2 - Processing parameters

SI 32768  
SF 400.1300045 MHz  
WDW EM  
SSB 0  
LB 0.30 Hz  
GB 0  
PC 1.00

8.012  
8.005  
7.502  
7.299  
6.807  
6.786  
6.736  
6.330  
6.177  
3.334  
3.326  
2.478  
2.082  
2.034  
2.027  
1.926

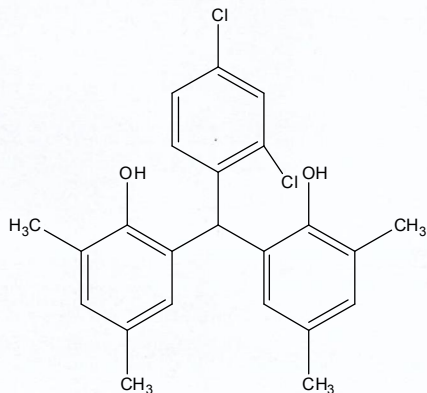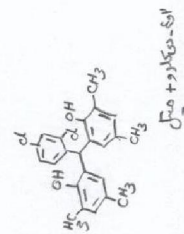

ppm

1.24  
1.07  
1.36  
1.92  
2.01  
1.23  
2.13  
6.34  
6.00

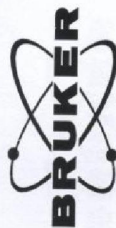

Current Data Parameters  
NAME 3H-3  
EXPNO 185  
PROCNO 1

F2 - Acquisition Parameters  
Date\_ 20140305  
Time\_ 8.09

INSTRUM spect  
PROBHD 5 mm Multinucl

PULPROG zg  
TD 32768  
SOLVENT DMSO

NS 32  
DS 0

SWH 11574.074 Hz  
FIDRES 0.363213 Hz

AQ 1.4156276 sec  
RG 71.8

DW 43.200 usec  
DE 6.00 usec

TE 300.0 K  
D1 5.00000000 sec

CHANNEL f1  
NUC1 1H  
P1 9.00 usec  
PL1 -6.00 dB

SFO1 400.1324710 MHz

F2 - Processing parameters  
SI 32768  
SF 400.1300045 MHz

WDW EM  
SSB 0  
LB 0.30 Hz

GB 0  
PC 1.00

7.984  
7.202  
7.064  
6.779  
6.728  
6.350  
6.263

3.347  
2.477  
2.095  
2.027  
1.951

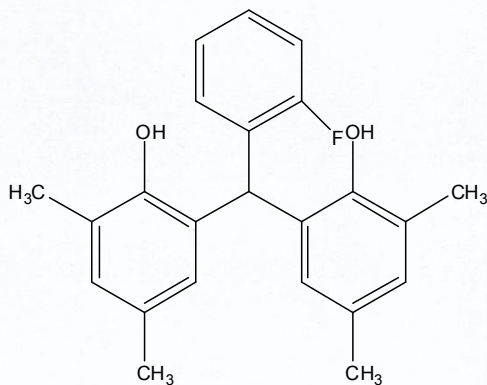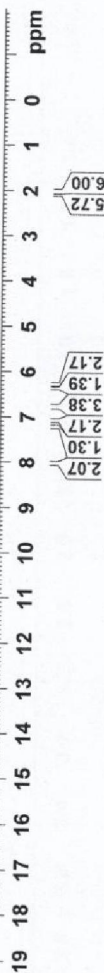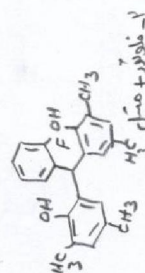

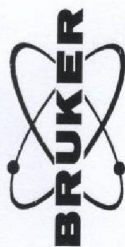

Current Data Parameters  
NAME 3H-3  
EXPNO 205  
PROCNO 1

F2 - Acquisition Parameters  
Date\_ 20140308  
Time\_ 14.15  
INSTRUM spect  
PROBHD 5 mm Multinucl  
PULPROG zg  
TD 32768  
SOLVENT DMSO  
NS 32  
DS 0  
SWH 11574.074 Hz  
FIDRES 0.353213 Hz  
AQ 1.4156276 sec  
RG 161.3  
DM 43.200 usec  
DE 6.00 usec  
TE 300.0 K  
D1 5.00000000 sec

===== CHANNEL f1 =====  
NUC1 1H  
P1 9.00 usec  
PL1 -6.00 dB  
SFO1 400.1324710 MHz

F2 - Processing parameters  
SI 32768  
SF 400.1300045 MHz  
WDW EM  
SSB 0  
LB 0.30 Hz  
GB 0  
PC 1.00

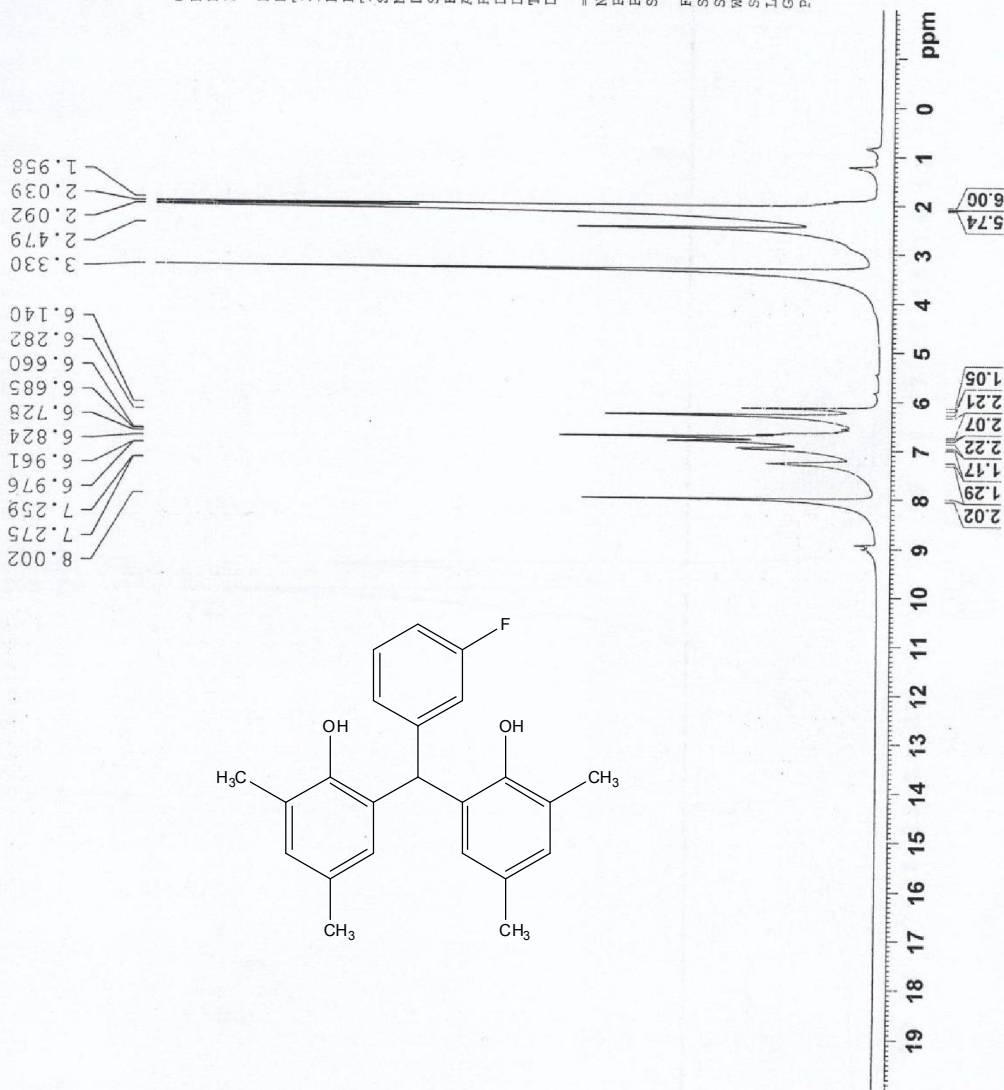



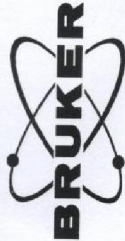

Current Data Parameters  
NAME 3H-3  
EXPNO 186  
PROCNO 1

F2 - Acquisition Parameters  
Date\_ 20140305  
Time\_ 8.18  
INSTRUM spect  
PROBHD 5 mm Multinucl  
PULPROG zgpg30  
TD 32768  
SOLVENT DMSO  
NS 32  
DS 0  
SWH 11574.074 Hz  
FIDRES 0.353213 Hz  
AQ 1.4156276 sec  
RG 114  
DW 43.200 usec  
DE 6.00 usec  
TE 300.0 K  
D1 5.00000000 sec

===== CHANNEL f1 =====  
NUC1 1H  
P1 9.00 usec  
PL1 -6.00 dB  
SFO1 400.1324710 MHz

F2 - Processing parameters  
SI 32768  
SF 400.1300045 MHz  
WDW EM  
SSB 0  
LB 0.30 Hz  
GB 0  
EC 1.00

7.965  
7.388  
6.886  
6.704  
6.251  
6.072

3.318

2.459

2.069

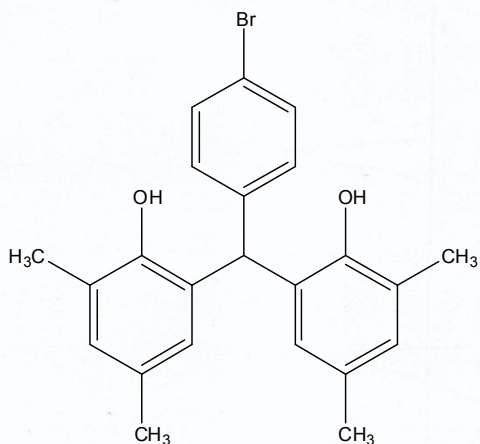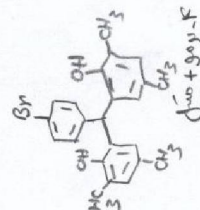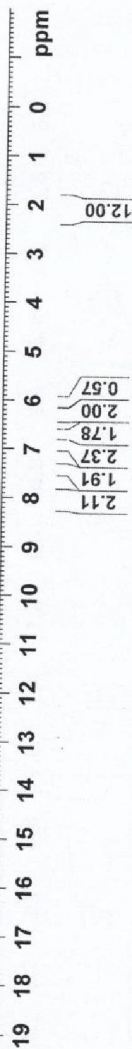

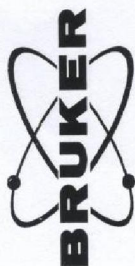

Current Data Parameters  
NAME 3H-3  
EXPNO 215  
PROCNO 1

F2 - Acquisition Parameters

Date\_ 20140309  
Time 14.00  
INSTRUM spect  
PROBHD 5 mm Multinucl  
PULPROG zg  
TD 32768  
SOLVENT DMSO  
NS 32  
DS 0  
SWH 11574.074 Hz  
FIDRES 0.353213 Hz  
AQ 1.4156276 sec  
RG 143.7  
DW 43.200 usec  
DE 6.00 usec  
TE 300.0 K  
D1 5.00000000 sec

===== CHANNEL f1 =====  
NUC1 1H  
P1 9.00 usec  
PL1 -6.00 dB  
SFO1 400.1324710 MHz

F2 - Processing parameters  
SI 32768  
SF 400.1300045 MHz  
WDW EM  
SSE 0  
LB 0.30 Hz  
GB 0  
FC 1.00

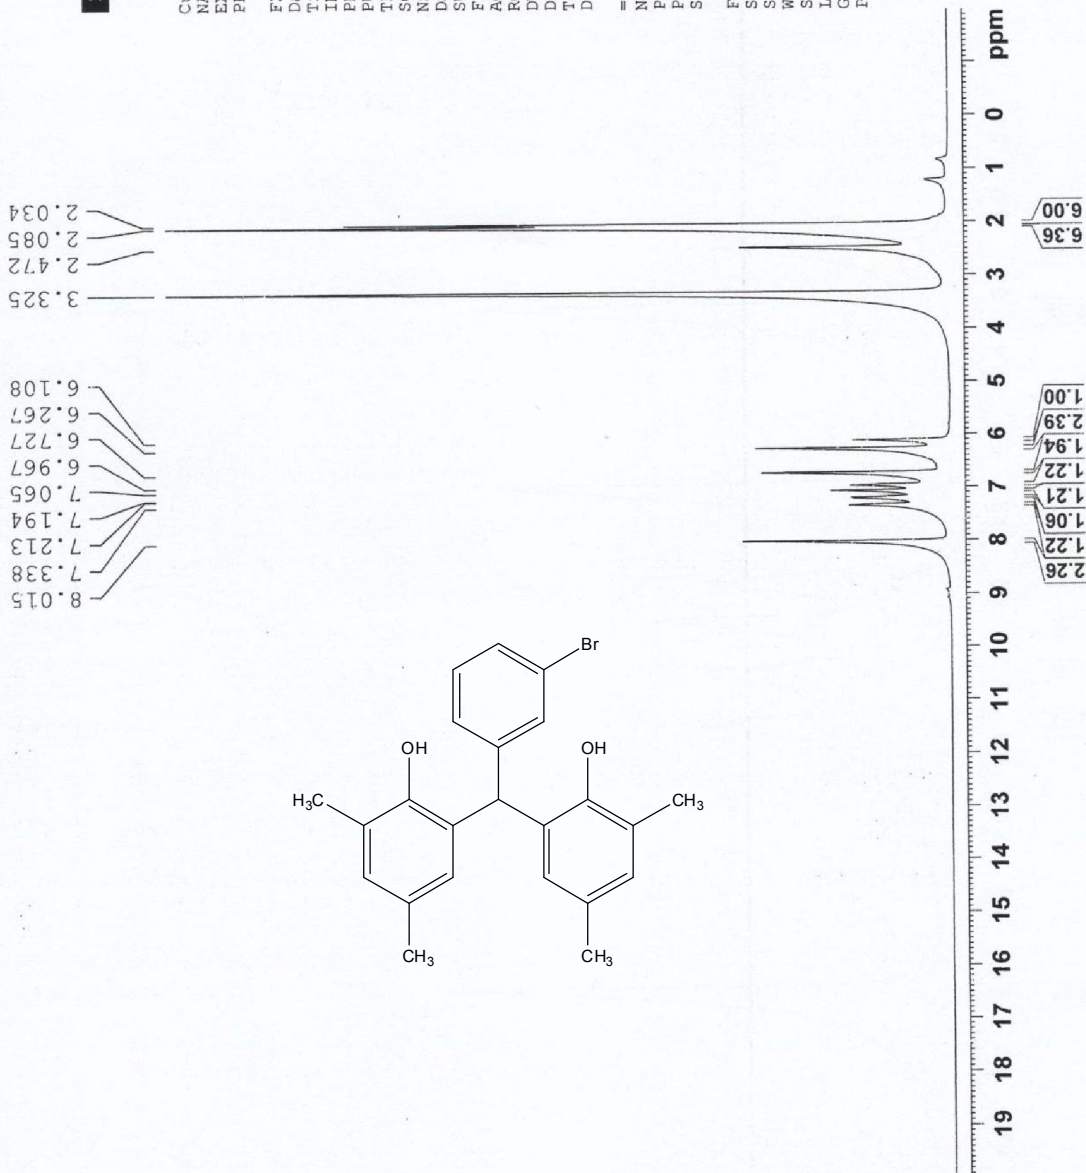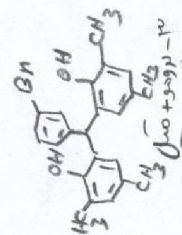

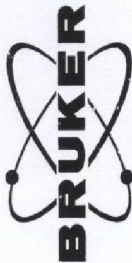

Current Data Parameters  
NAME 3H-3  
EXPNO 170  
PROCNO 1

F2 - Acquisition Parameters  
Date\_ 20140304  
Time 8.19

INSTRUM spect  
PROBHD 5 mm Multinucl  
PULPROG zg  
TD 32768  
SOLVENT DMSO  
NS 32  
DS 0  
SWH 11574.074 Hz  
FIDRES 0.353213 Hz  
AQ 1.4156276 sec  
RG 64  
DW 43.200 usec  
DE 6.00 usec  
TE 300.0 K  
D1 5.00000000 sec

===== CHANNEL f1 =====  
NUC1 1H  
P1 9.00 usec  
PL1 -6.00 dB  
SFO1 400.1324710 MHz

F2 - Processing parameters  
SI 32768  
SF 400.1300045 MHz  
WDW EM  
SSB 0  
LB 0.30 Hz  
GB 0  
PC 1.00

7.970  
7.538  
7.218  
7.103  
7.087  
6.836  
6.722  
6.356  
6.184

3.349  
2.478  
2.091  
2.020  
1.944

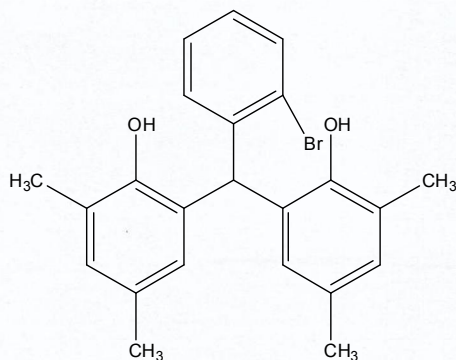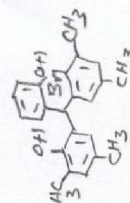

2,2'-bis(4-hydroxy-3-methylphenyl)-1,1'-diphenyl ether

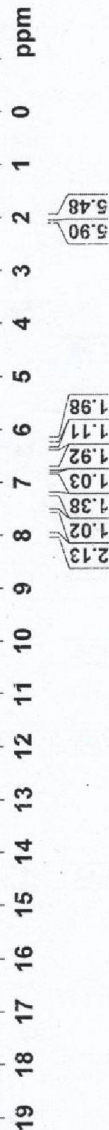



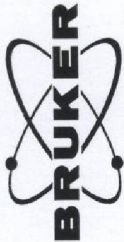

Current Data Parameters  
NAME 3H-3  
EXPNO 169  
PROCNO 1

F2 - Acquisition Parameters  
Date\_ 20140303  
Time\_ 15.06  
INSTRUM spect  
PROBHD 5 mm Multinucl  
PULPROG zg  
TD 32768  
SOLVENT DMSO  
NS 32  
DS 0  
SWH 11574.074 Hz  
FIDRES 0.353213 Hz  
AQ 1.4156276 sec  
RG 101.6  
DW 43.200 usec  
DE 6.00 usec  
TE 300.0 K  
D1 5.00000000 sec

===== CHANNEL f1 =====  
NUC1 1H  
P1 9.00 usec  
PL1 -6.00 dB  
SFO1 400.1324710 MHz

F2 - Processing parameters  
SI 32768  
SF 400.1300045 MHz  
WDW EM  
SSB 0  
LB 0.30 Hz  
GB 0  
PC 1.00

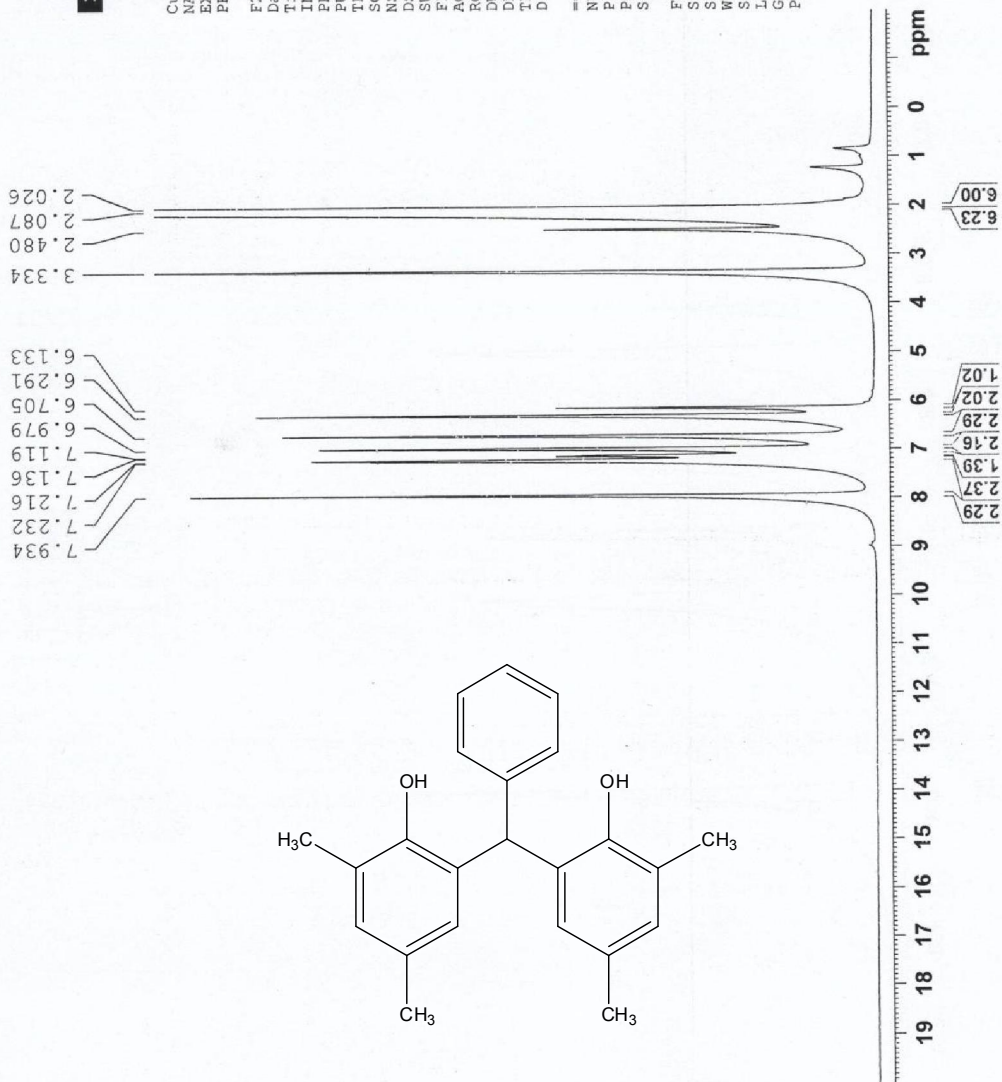

بسم الله الرحمن الرحيم

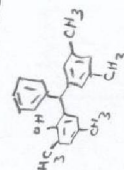

بسم الله الرحمن الرحيم



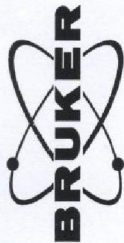

Current Data Parameters  
NAME 3H-3  
EXPNO 207  
PROCNO 1

F2 - Acquisition Parameters  
Date\_ 20140308  
Time 14.33  
INSTRUM spect  
PROBHD 5 mm Multinucl  
PULPROG zg  
TD 32768  
SOLVENT DMSO  
NS 32  
DS 0  
SWH 11574.074 Hz  
FIDRES 0.353213 Hz  
AQ 1.4156376 sec  
RG 161.3  
DW 43.200 usec  
DE 6.00 usec  
TE 300.0 K  
D1 5.00000000 sec

===== CHANNEL f1 =====  
NUC1 1H  
P1 9.00 usec  
PL1 -6.00 dB  
SFO1 400.1324710 MHz

F2 - Processing parameters  
SI 32768  
SF 400.1300045 MHz  
WDW EM  
SSB 0  
LB 0.30 Hz  
GB 0  
PC 1.00

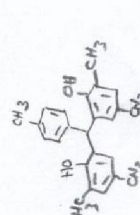

مسجل - 15

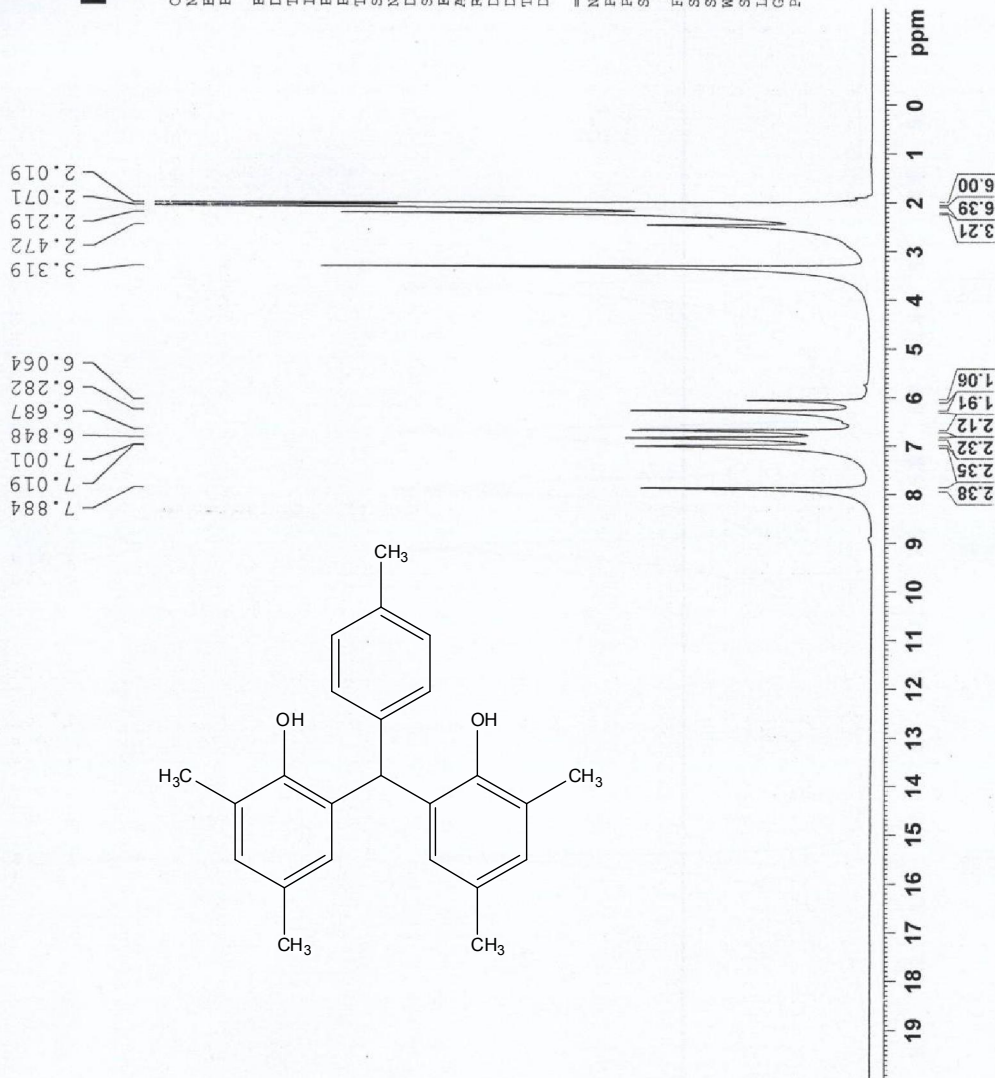

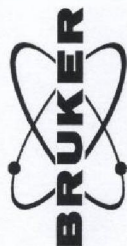

Current Data Parameters  
NAME 3H-3  
EXPNO 238  
PROCNO 1

F2 - Acquisition Parameters

Date\_ 20140312  
Time 13.40  
INSTRUM spect  
PROBHD 5 mm Multinucl  
PULPROG zg  
TD 32768  
SOLVENT DMSO  
NS 32  
DS 0  
SWH 11574.074 Hz  
FIDRES 0.353213 Hz  
AQ 1.41156276 sec  
RG 71.8  
DE 43.200 usec  
WE 6.00 usec  
TE 300.0 K  
D1 5.00000000 sec

===== CHANNEL f1 =====  
NUC1 1H  
P1 9.00 usec  
PL1 -6.00 dB  
SFO1 400.1324710 MHz

F2 - Processing parameters

SI 32768  
SF 400.1300045 MHz  
WDW EM  
SSB 0  
LB 0.30 Hz  
GB 0  
PC 1.00

7.944  
7.779  
7.181  
6.826  
6.729  
6.680  
6.618  
6.598  
6.257  
6.070  
3.489  
2.466  
2.107  
2.069  
2.031  
2.018  
1.908

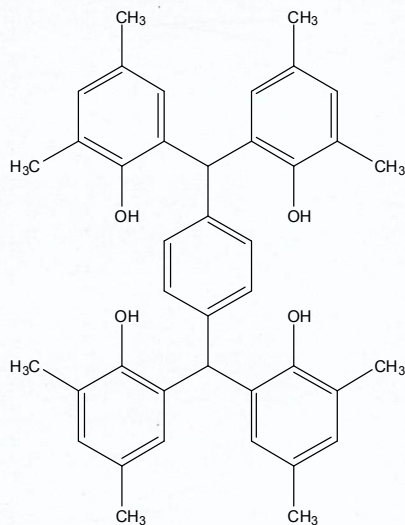

19 18 17 16 15 14 13 12 11 10 9 8 7 6 5 4 3 2 1 0 ppm

2.08  
1.96  
3.97  
2.40  
2.44  
4.06  
1.98

11.77  
12.00

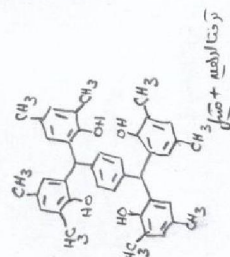



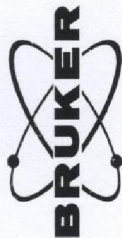

Current Data Parameters  
NAME 3H-3  
EXPNO 214  
PROCNO 1

F2 - Acquisition Parameters

Date\_ 20140309  
Time\_ 13.31  
INSTRUM spect  
PROBHD 5 mm Multinucl  
PULPROG zg  
TD 32768  
SOLVENT DMSO  
NS 32  
DS 0  
SWH 11574.074 Hz  
FIDRES 0.353213 Hz  
AQ 1.4156276 sec  
RG 40.3  
DW 43.200 usec  
DE 6.00 usec  
TE 300.0 K  
D1 5.00000000 sec

===== CHANNEL f1 =====  
NUC1 1H  
P1 9.00 usec  
PL1 -6.00 dB  
SFO1 400.1324710 MHz

F2 - Processing parameters

SI 32768  
SF 400.1300045 MHz  
WDW EM  
SSB 0  
LB 0.30 Hz  
GB 0  
PC 1.00

8.254  
6.681  
6.628  
3.877  
3.742  
3.387  
2.465  
2.102  
2.066  
2.000

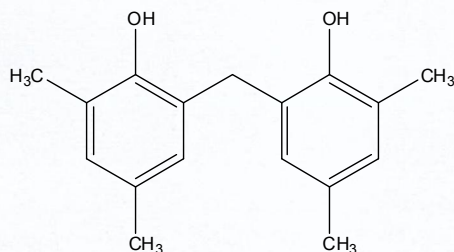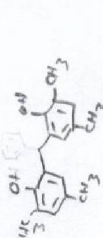

2,2',6,6'-tetramethyl-4,4'-dihydroxybiphenyl

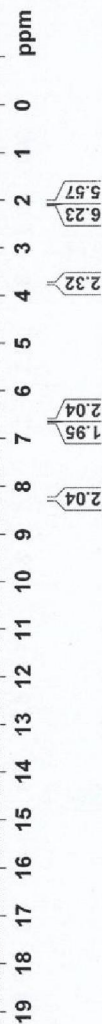



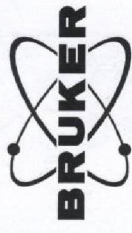

Current Data Parameters  
NAME 3H-3  
EXPNO 2392  
PROCNO 1

F2 - Acquisition Parameters  
Date\_ 20150114  
Time 9.52  
INSTRUM spect  
PROBHD 5 mm Multinucl  
PULPROG zg  
TD 32768  
SOLVENT DMSO  
NS 16  
DS 0  
SWH 8012.820 Hz  
FIDRES 0.244532 Hz  
AQ 2.0447731 sec  
RG 406.4  
DM 62.400 usec  
DE 6.00 usec  
TE 300.0 K  
D1 5.00000000 sec

===== CHANNEL f1 =====  
NUC1 1H  
P1 9.00 usec  
PL1 -6.00 dB  
SF01 400.1336012 MHz

F2 - Processing parameters  
SI 32768  
SF 400.1300065 MHz  
WDW EM  
SSB 0  
LB 0.30 Hz  
GB 0  
PC 1.00

8.201  
6.793  
6.654  
4.491  
3.354  
2.479  
2.108  
2.076  
1.881  
1.254  
1.138  
0.803

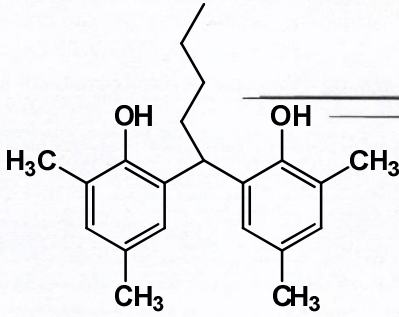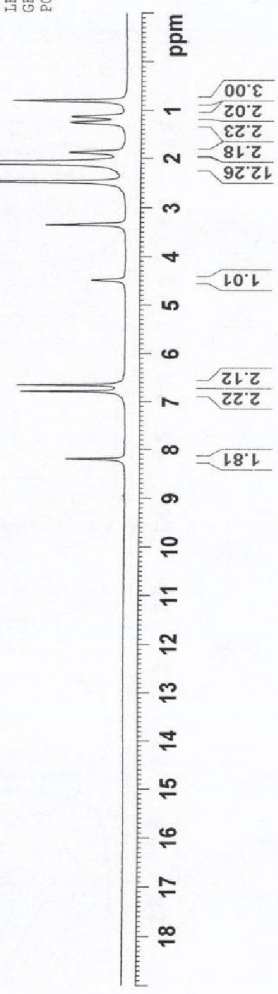

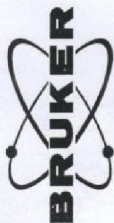

Current Data Parameters  
NAME 3H-3  
EXPNO 2381  
PROCNO 1

F2 - Acquisition Parameters

Date\_ 20150114  
Time 9.46  
INSTRUM spect  
PROBHD 5 mm Multinucl  
PULPROG 32769  
TD 65536  
SOLVENT DMSO  
NS 16  
DS 0  
SWH 8012.820 Hz  
FIDRES 0.244532 Hz  
AQ 2.0447731 sec  
RG 574.7  
DW 62.400 usec  
DE 6.00 usec  
TE 300.0 K  
D1 5.0000000 sec

===== CHANNEL f1 =====  
NUC1 1H  
P1 9.00 usec  
PL1 -6.00 dB  
SFO1 400.1336012 MHz

F2 - Processing parameters

SI 32768  
SF 400.130095 MHz  
WDW EM  
SSB 0  
LB 0.30 Hz  
GB 0  
PC 1.00

0.854  
1.326  
1.342  
1.358  
1.763  
1.780  
1.798  
2.085  
2.115  
2.484  
3.336  
3.359  
4.625  
4.643  
4.662  
6.815  
6.859  
8.256

6.00  
1.02  
2.01  
6.01  
6.13  
1.00  
2.09  
2.24  
1.87

ppm

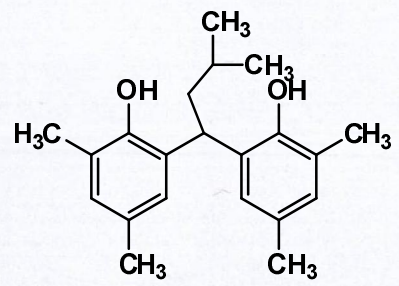

<sup>13</sup>C NMR Spectra of selected compounds.

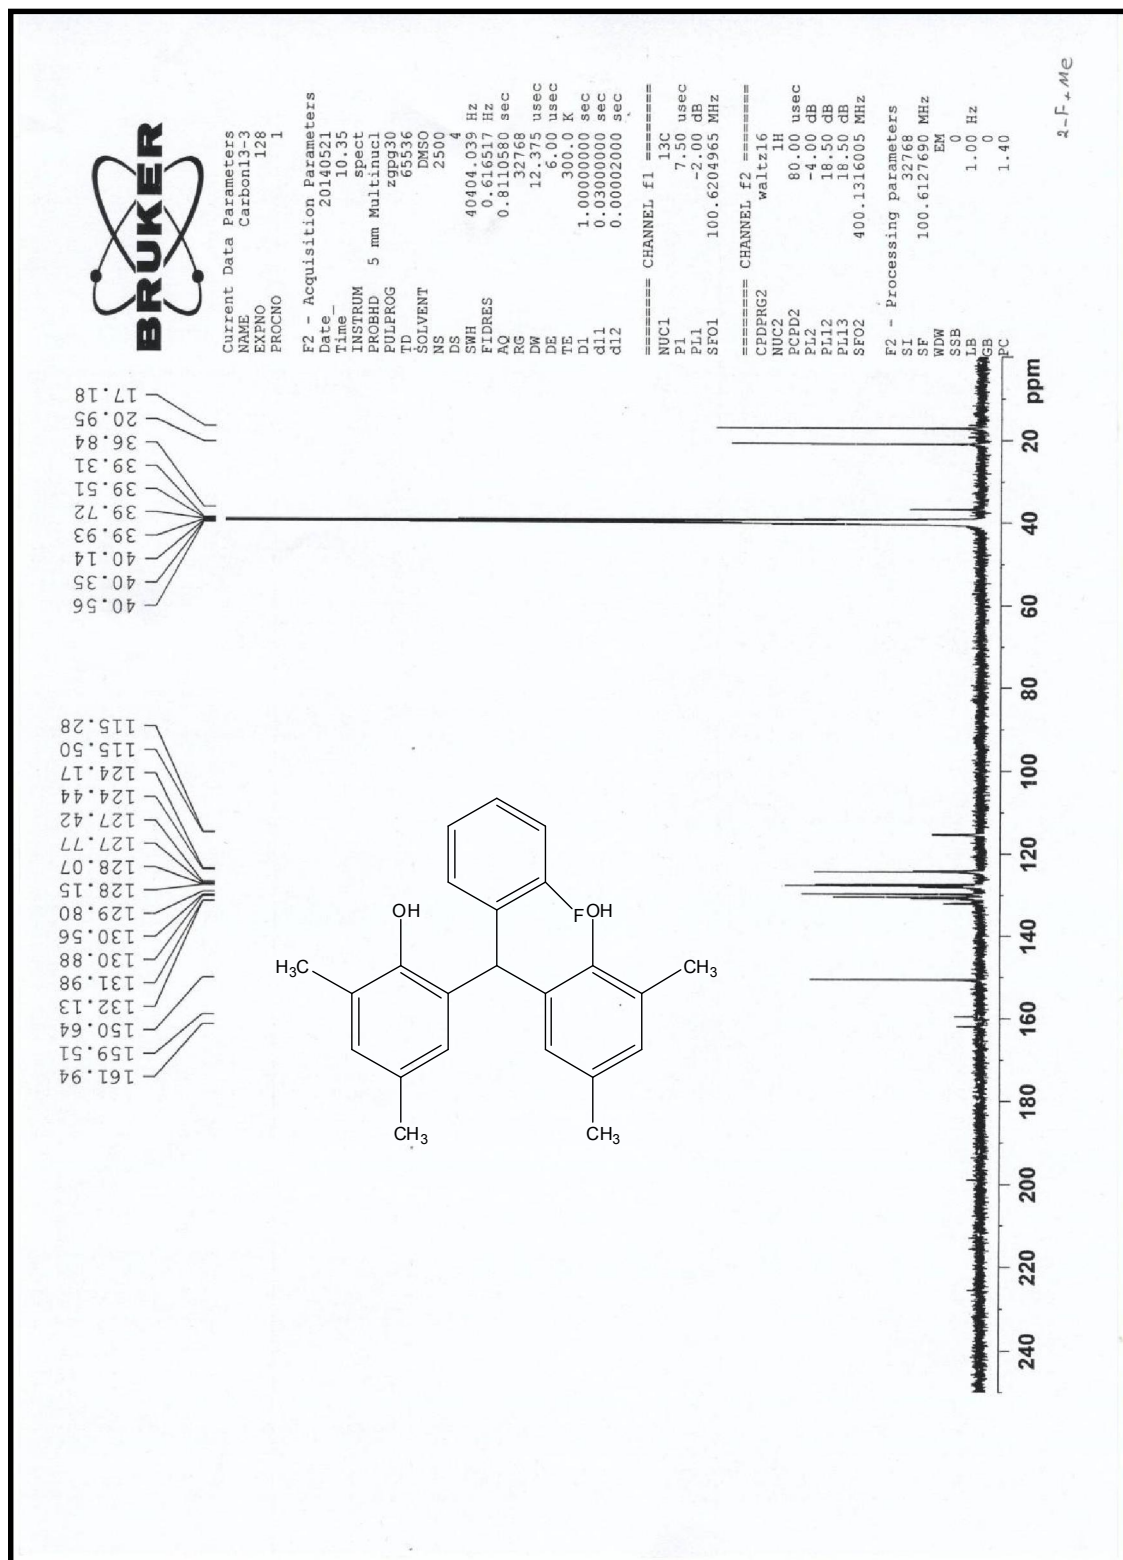

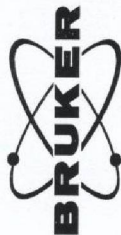

Current Data Parameters  
NAME Carbon13-3  
EXPNO 133  
PROCNO 1

F2 - Acquisition Parameters  
Date\_ 20140525

Time 13.47  
INSTRUM spect  
PROBHD 5 mm Multinuc1  
PULPROG zgpg30  
TD 65536  
SOLVENT DMSO  
NS 2500  
DS 4  
SWH 40404.039 Hz  
FIDRES 0.616317 Hz  
AQ 0.6110580 sec  
RG 32768  
DM 12.375 usec  
DE 6.00 usec  
TE 300.0 K  
D1 1.00000000 sec  
d11 0.03000000 sec  
d12 0.00020000 sec

===== CHANNEL f1 =====  
NUC1 <sup>13</sup>C  
P1 7.50 usec  
PL1 -2.00 dB  
SFO1 100.6204965 MHz

===== CHANNEL f2 =====  
CPDPRG2 waltz16  
NUC2 <sup>1</sup>H  
PCPD2 80.00 usec  
PL2 -4.00 dB  
PL12 18.50 dB  
PL13 18.50 dB  
SFO2 400.1316005 MHz

F2 - Processing parameters  
SI 32768  
SF 100.6127690 MHz  
WDW EM  
SSB 0  
LB 1.00 Hz  
GB 0  
PC 1.40

43.50  
40.58  
40.38  
40.17  
39.96  
39.75  
39.54  
39.33  
20.94  
17.19

150.68  
148.06  
131.98  
130.94  
130.57  
129.86  
128.98  
128.73  
128.07  
127.57  
124.65  
121.84

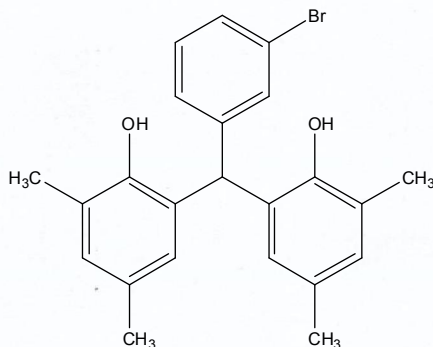

ppm

307.46



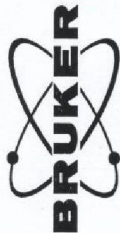

Current Data Parameters  
NAME Carbon13-3  
EXPNO 129  
PROCNO 1

F2 - Acquisition Parameters  
Date\_ 20140524  
Time\_ 11.03  
INSTRUM spect  
PROBHD 5 mm Multinucl  
PULPROG zgpg30  
TD 65536  
SOLVENT DMSO  
NS 2500  
DS 4  
SWH 40404.039 Hz  
FIDRES 0.616517 Hz  
AQ 0.8110580 sec  
RG 32768  
DM 12.375 usec  
DE 6.00 usec  
TE 300.0 K  
D1 1.00000000 sec  
d11 0.03000000 sec  
d12 0.00002000 sec

===== CHANNEL f1 =====  
NUC1 13C  
P1 7.50 usec  
PL1 -2.00 dB  
SF01 100.6204965 MHz  
===== CHANNEL f2 =====  
CPDPRG2 waltz16  
NUC2 1H  
PCPD2 80.00 usec  
PL2 -4.00 dB  
PL12 18.50 dB  
PL13 18.50 dB  
SF02 400.1316005 MHz

F2 - Processing parameters  
SI 32768  
SF 100.6127690 MHz  
WDW EM  
SSB 0  
LB 1.00 Hz  
GB 0  
PC 1.40

4-MC + Me

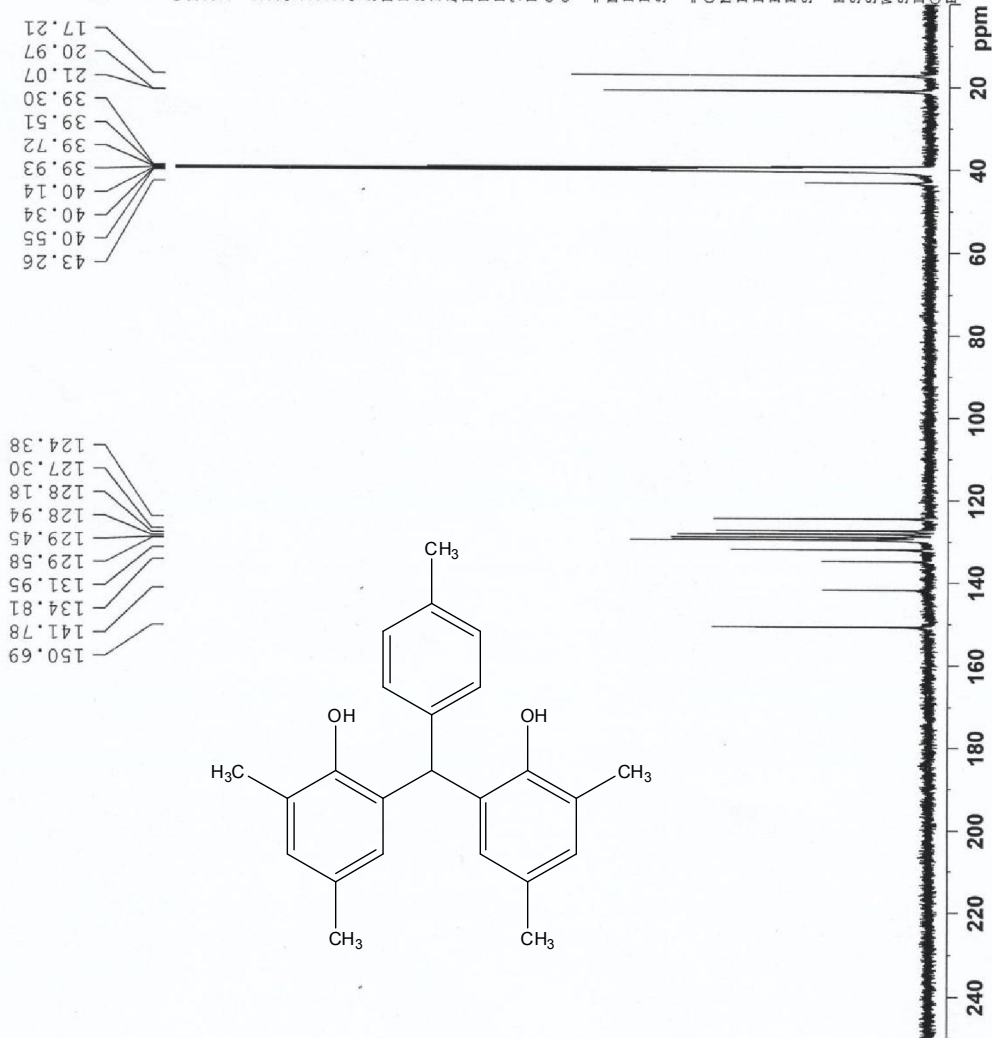

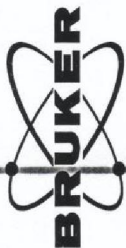

Current Data Parameters  
NAME Carbon13-3  
EXPNO 144  
PROCNO 1

F2 - Acquisition Parameters  
Date\_ 20140531  
Time\_ 13.46  
INSTRUM spect  
PROBHD 5 mm Multinucl  
PULPROG zgpg30  
TD 65536  
SOLVENT DMSO  
NS 2500  
DS 4  
SWH 40404.039 Hz  
FIDRES 0.616517 Hz  
AQ 0.8110580 sec  
RG 32768  
DE 12.375 usec  
TE 300.0 K  
D1 1.00000000 sec  
d11 0.03000000 sec  
d12 0.0002000 sec

CHANNEL f1 =====  
NUC1 <sup>13</sup>C  
P1 7.50 usec  
PL1 -2.00 dB  
SF01 100.6204985 MHz

CHANNEL f2 =====  
CPDPRG2 waltz16  
NUC2 <sup>1</sup>H  
PCPD2 80.00 usec  
PL2 -4.00 dB  
PL12 18.50 dB  
PL13 18.50 dB  
SFO2 400.1316005 MHz

F2 - Processing parameters  
SI 32768  
SF 100.6127690 MHz  
WDW EM  
SSB 0  
LB 1.00 Hz  
GB 0  
FC 1.40

*tert-butyl + 4-n*

153.25  
151.02  
146.18  
141.46  
137.52  
130.87  
130.64  
130.50  
125.08  
123.47  
121.76

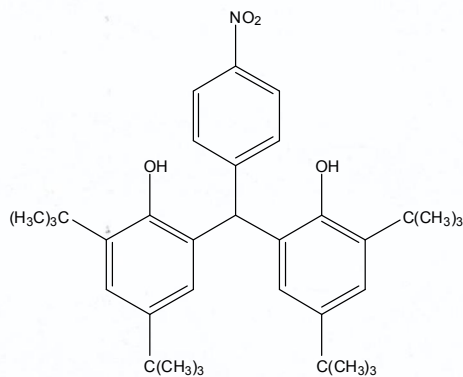

44.12  
40.54  
40.33  
40.12  
39.91  
39.70  
39.50  
39.29  
35.16  
34.27  
31.70  
30.35

ppm

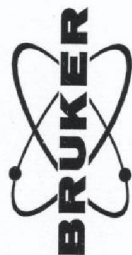

Current Data Parameters  
NAME Carbon13-3  
EXPNO 122  
PROCNO 1

F2 - Acquisition Parameters  
Date\_ 20140518  
Time 13.53  
INSTRUM spect  
PROBHD 5 mm Multinucl  
PULPROG zgpg30  
TD 65536  
SOLVENT DMSO  
NS 2500  
DS 4  
SWH 40404.039 Hz  
FIDRES 0.616517 Hz  
AQ 0.8110580 sec  
RG 32768  
DW 12.375 usec  
DE 6.00 usec  
TE 300.0 K  
D1 1.00000000 sec  
d11 0.03000000 sec  
d12 0.00002000 sec

===== CHANNEL f1 =====  
NUC1 13C  
P1 7.50 usec  
PL1 -2.00 dB  
SFO1 100.6204965 MHz

===== CHANNEL f2 =====  
CPDPRG2 waltz16  
NUC2 1H  
PCPD2 80.00 usec  
PL2 -4.00 dB  
PL12 18.50 dB  
PL13 18.50 dB  
SFO2 400.1316005 MHz

F2 - Processing parameters  
SI 32768  
SF 100.6127690 MHz  
WDW EM  
SSB 0  
LB 1.00 Hz  
GB 0  
FC 1.40

Then + Me

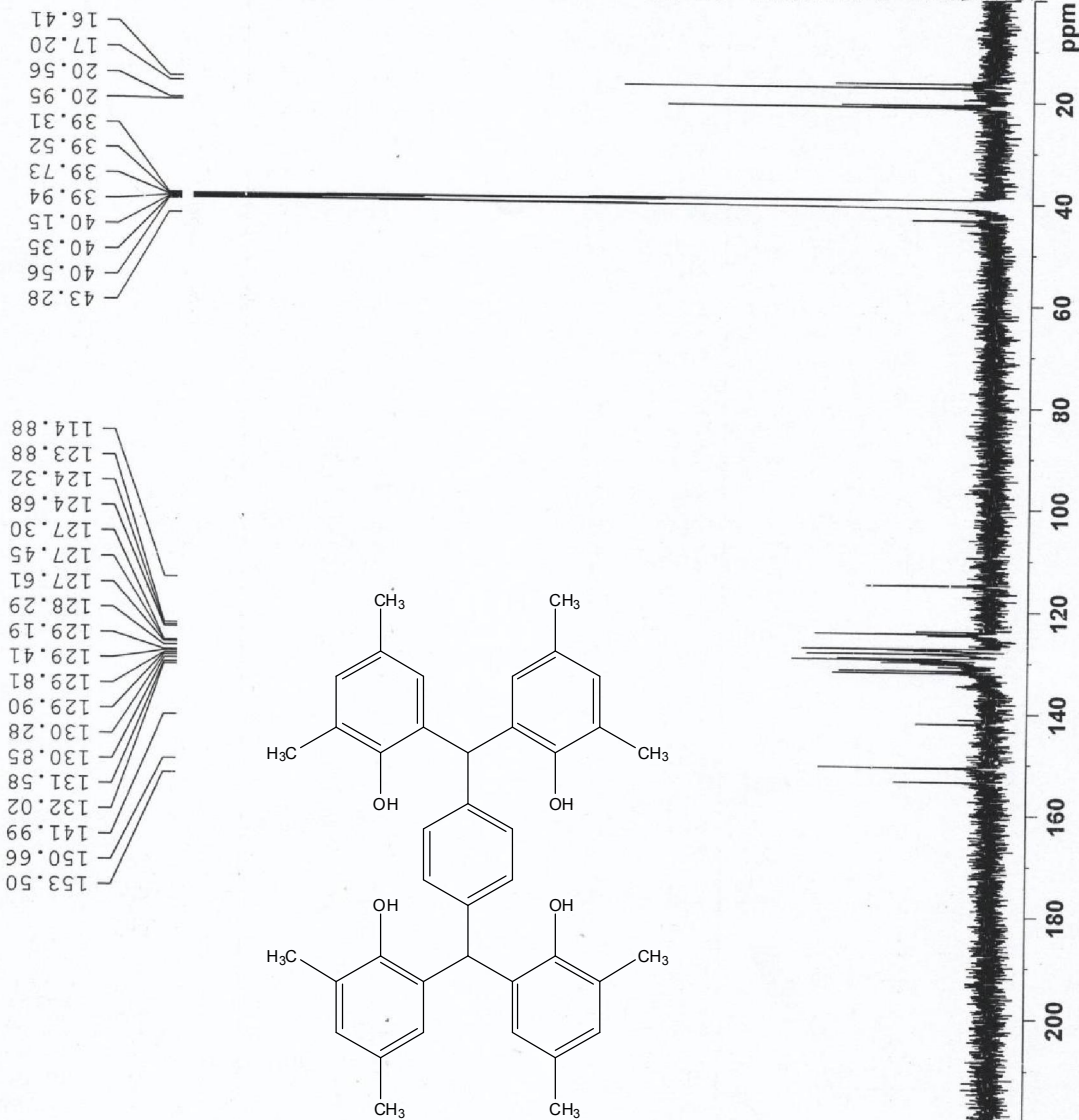

Supplement: c4nj02340d1.pdf [file c4nj02340d1.pdf]
